# Supplementary material for: Structural, strength and fracture mechanisms of superconducting transition metal nitrides TM3N5 (TM = W and Mo)
Source: Royal Society of Chemistry journal article supplement (doi:10.1039/d4cp04821k), 2025-01-01
Supplement: d4cp04821k1.pdf [file d4cp04821k1.pdf]

## Supplemental Material

### Structural, strength, and fracture mechanisms of superconducting transition metal nitrides $\text{TM}_3\text{N}_5$ (TM = W and Mo)

Haiyan Yan<sup>a,\*</sup>, Wenhui Zhang<sup>b,\*</sup>, Lei Chen<sup>a,c</sup>, Yun Zhang<sup>a,c</sup>, Hui Wang<sup>b</sup>, Meiguang Zhang<sup>a,c,†</sup>, Qun Wei<sup>d,‡</sup>

<sup>a</sup> *College of Chemistry and Chemical Engineering, Collaborative Innovation Center of Rare-Earth Functional Materials and Devices Development, Baoji University of Arts and Sciences, Baoji 721013, China*

<sup>b</sup> *School of Physics and Electronic Engineering, Harbin Normal University, Harbin 150025, Heilongjiang, China*

<sup>c</sup> *College of Physics and Optoelectronic Technology, Baoji University of Arts and Sciences, Baoji 721013, China*

<sup>d</sup> *School of Physics, Xidian University, Xi'an 710071, China*

---

\*These authors contributed equally to this work.

†[zhmgbj@126.com](mailto:zhmgbj@126.com)

‡[weiaqun@163.com](mailto:weiaqun@163.com)

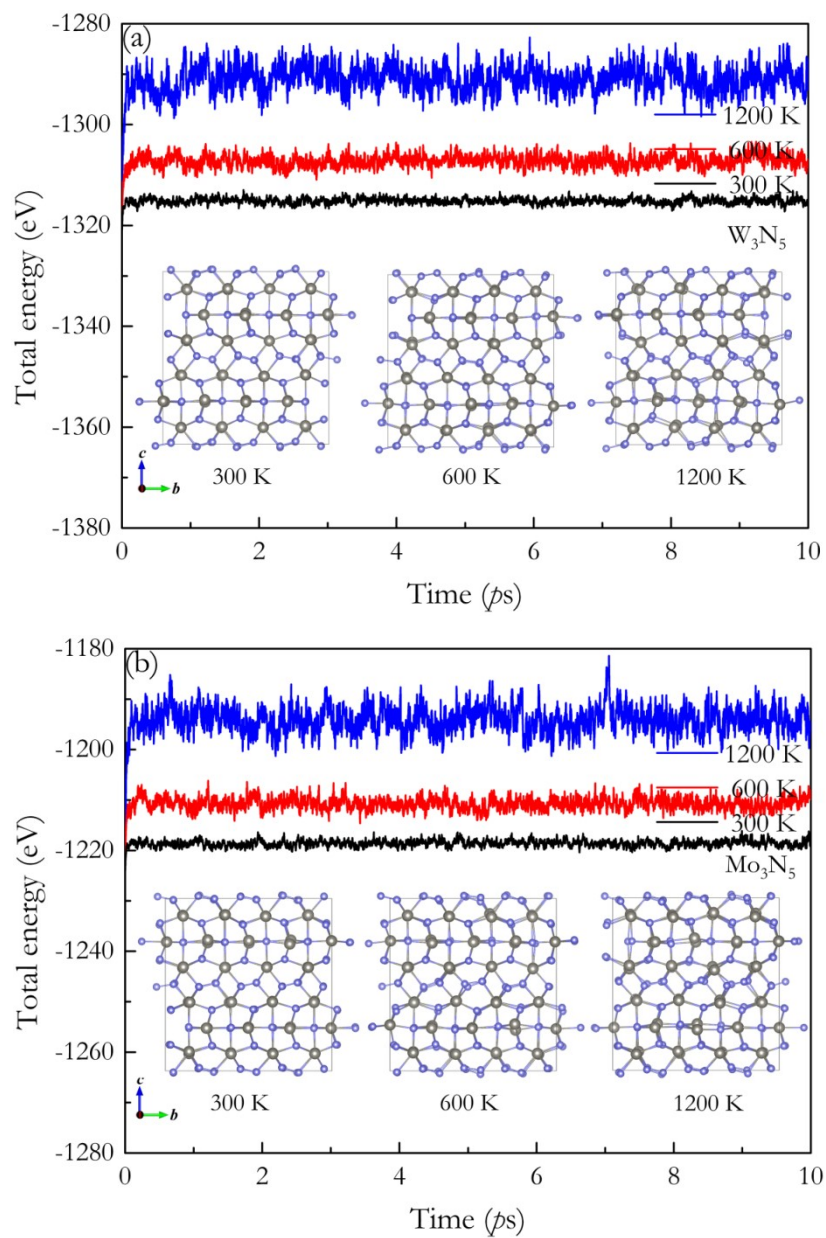

**Fig. S1** AIMD simulations at 300, 600, and 1200 K for  $W_3N_5$  (a) and  $Mo_3N_5$  (b) at ambient conditions. Insets are the equilibrium structures after 10 ps.

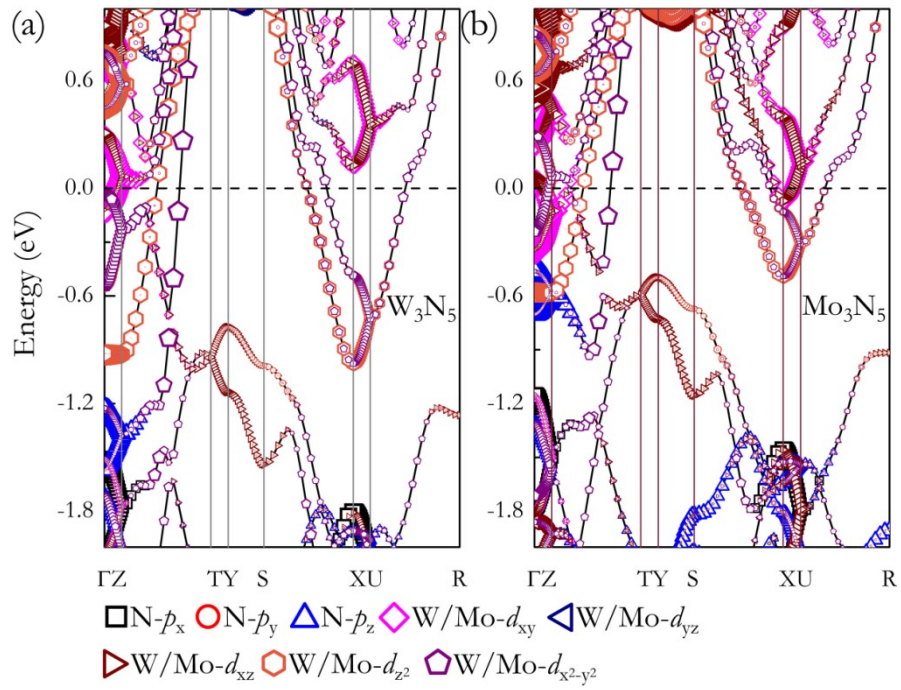

**Fig. S2** Projected weights of atomic orbitals in the band structures of  $W_3N_5$  (a) and  $Mo_3N_5$  at ambient pressure. The  $E_F$  is indicated by horizontal dashed lines.

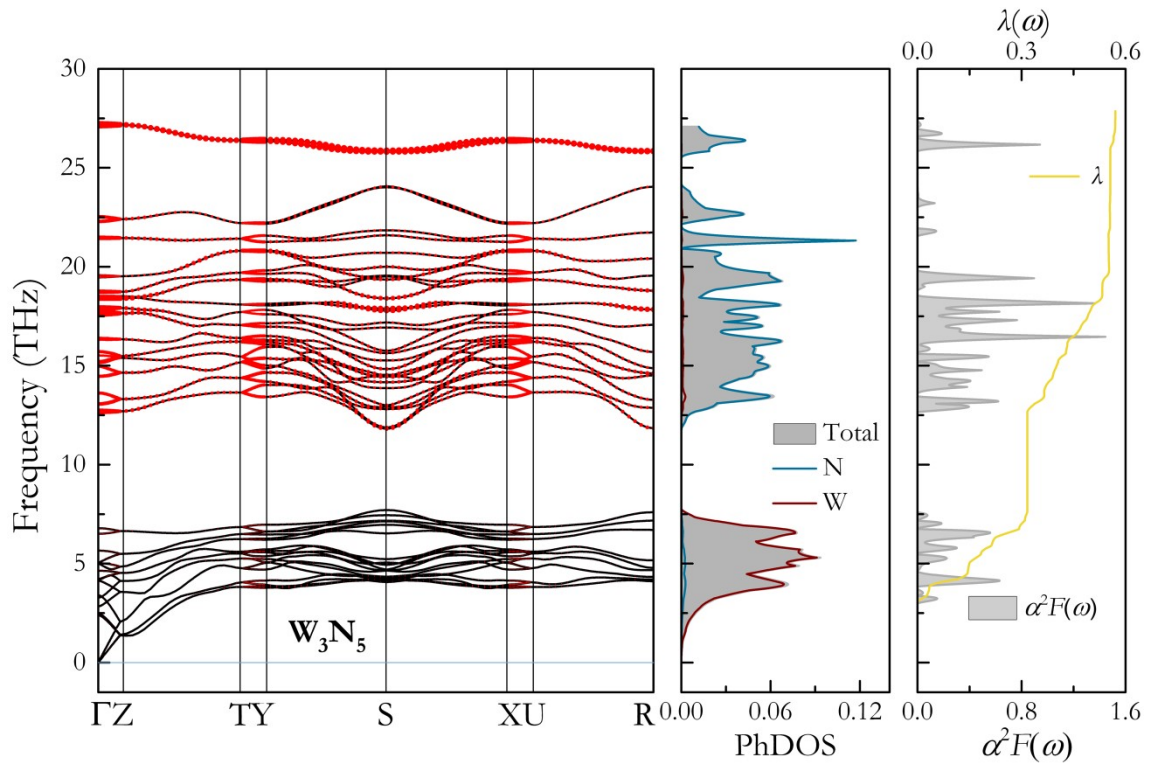

**Fig. S3** Phonon dispersion curves, projected phonon density of states, Eliashberg spectral function  $\alpha^2F(\omega)$ , and the EPC parameter  $\lambda$  for  $W_3N_5$  at ambient pressure.
